# Supplementary material for: Automated Remote Monitoring of Depression: Acceptance Among Low-Income Patients in Diabetes Disease Management
Source: PubMed Central journal article supplement (PMC4736285; doi:10.2196/mental.4823), 2016-01-25
Supplement: mental_v3i1e6_app1.pdf [file mental_v3i1e6_app1.pdf]

## Multimedia Appendix: DCAT TC Data

Table A-1. Comparison of samples in the first analysis to the rest of patients in the TC arm of DCAT

| Characteristic                                                                           | Sample for First Analysis |                         | Rest of Patients in the TC Arm of DCAT |                         | <i>P</i> <sup>b</sup> |
|------------------------------------------------------------------------------------------|---------------------------|-------------------------|----------------------------------------|-------------------------|-----------------------|
|                                                                                          | N                         | Statistics <sup>a</sup> | N                                      | Statistics <sup>a</sup> |                       |
| Female                                                                                   | 109                       | 72 (66.1%)              | 333                                    | 201 (60.4%)             | 0.29                  |
| Age                                                                                      | 109                       | 51.94 (9.01)            | 333                                    | 52.80 (8.87)            | 0.38                  |
| Hispanic/Latino                                                                          | 109                       | 105 (96.3%)             | 332                                    | 295 (88.9%)             | 0.02                  |
| Spanish as preferred language                                                            | 109                       | 93 (85.0%)              | 333                                    | 268 (80.5%)             | 0.26                  |
| Married                                                                                  | 109                       | 49 (45.0%)              | 333                                    | 174 (52.3%)             | 0.19                  |
| PHQ-9 (range 0–27, higher=more severe depression) <sup>b, c</sup>                        | 109                       | 5.73 (4.93)             | 333                                    | 5.48 (5.05)             | 0.66                  |
| Total number of socioeconomic stressors <sup>c</sup>                                     | 109                       | 2.28 (1.56)             | 333                                    | 2.35 (1.59)             | 0.72                  |
| SCL-20, mean score <sup>c, d</sup>                                                       | 109                       | 0.54 (0.53)             | 333                                    | 0.51 (0.52)             | 0.62                  |
| SF-12 mental (general population=50, higher=better) <sup>c, e</sup>                      | 109                       | 50.54 (9.15)            | 333                                    | 50.96 (10.09)           | 0.70                  |
| Time with diabetes in years                                                              | 107                       | 10.15 (7.42)            | 330                                    | 10.61 (7.14)            | 0.57                  |
| On insulin treatment <sup>c</sup>                                                        | 109                       | 82 (75.2%)              | 333                                    | 229 (68.8%)             | 0.20                  |
| BMI <sup>c, f</sup>                                                                      | 109                       | 32.93 (6.55)            | 333                                    | 32.93 (6.81)            | 1.00                  |
| A1C value <sup>c, g</sup>                                                                | 108                       | 8.87 (1.39)             | 332                                    | 9.12 (1.60)             | 0.14                  |
| Low-density lipoprotein cholesterol <sup>c</sup>                                         | 108                       | 167.08 (36.20)          | 332                                    | 171.82 (39.51)          | 0.27                  |
| Whitty-9 diabetes symptoms (range 1–5, 1=none to 5=every day) <sup>c</sup>               | 109                       | 1.64 (0.54)             | 333                                    | 1.60 (0.49)             | 0.45                  |
| Number of diabetes complications <sup>c</sup>                                            | 109                       | 1.26 (0.89)             | 333                                    | 1.26 (0.97)             | 0.96                  |
| Toolbert diabetes self-care in the past 7 days (range 0–7) <sup>c</sup>                  | 109                       | 4.63 (0.98)             | 333                                    | 4.42 (1.08)             | 0.08                  |
| Diabetes emotional burden (range 1–5, 1=not a problem to 5=very burdensome) <sup>c</sup> | 109                       | 2.53 (1.35)             | 333                                    | 2.49 (1.50)             | 0.79                  |
| Diabetes regime distress (range 1–5, 1=not a problem to 5=very burdensome) <sup>c</sup>  | 109                       | 2.19 (1.14)             | 333                                    | 2.19 (1.37)             | 0.98                  |
| Self-rated health (range 1–5, 1=poor to 5=excellent) <sup>c</sup>                        | 109                       | 2.29 (0.60)             | 333                                    | 2.37 (0.71)             | 0.25                  |
| Chronic pain <sup>c</sup>                                                                | 109                       | 17 (15.6%)              | 333                                    | 58 (17.4%)              | 0.66                  |
| SF-12 physical (general                                                                  | 109                       | 43.18 (9.62)            | 333                                    | 43.85 (9.50)            | 0.52                  |

| Characteristic                                                             | Sample for First Analysis |                         | Rest of Patients in the TC Arm of DCAT |                         | <i>P</i> <sup>b</sup> |
|----------------------------------------------------------------------------|---------------------------|-------------------------|----------------------------------------|-------------------------|-----------------------|
|                                                                            | N                         | Statistics <sup>a</sup> | N                                      | Statistics <sup>a</sup> |                       |
| population=50, higher=better health) <sup>c, e</sup>                       |                           |                         |                                        |                         |                       |
| Sheehan disability scale (range 0–10, 0=none to 10=extremely) <sup>c</sup> | 109                       | 2.21 (2.34)             | 333                                    | 2.14 (2.43)             | 0.81                  |
| Number of ICD-9 diagnosis <sup>c, h</sup>                                  | 108                       | 8.60 (4.50)             | 332                                    | 7.96 (4.14)             | 0.18                  |
| Number of clinic visits <sup>c</sup>                                       | 107                       | 10.44 (5.61)            | 317                                    | 9.54 (5.56)             | 0.15                  |
| Number of emergency room visits <sup>c</sup>                               | 41                        | 1.33 (0.61)             | 90                                     | 1.23 (0.42)             | 0.35                  |
| Number of hospitalizations <sup>c</sup>                                    | 15                        | 1.47 (0.83)             | 33                                     | 1.09 (0.26)             | 0.10                  |
| Willingness to use <sup>c</sup>                                            | 109                       | 4.02 (0.93)             | 153                                    | 3.56 (1.40)             | 0.002                 |
| Perceived ease-of-use <sup>c</sup>                                         | 109                       | 4.05 (0.56)             | 146                                    | 3.98 (0.66)             | 0.36                  |
| Perceived usefulness <sup>c</sup>                                          | 109                       | 3.63 (0.89)             | 145                                    | 3.60 (0.94)             | 0.81                  |
| Perceived non-intrusiveness <sup>c</sup>                                   | 109                       | 4.20 (0.87)             | 146                                    | 4.02 (1.05)             | 0.13                  |
| Perceived privacy/security <sup>c</sup>                                    | 109                       | 4.10 (1.11)             | 148                                    | 4.14 (1.12)             | 0.81                  |
| Preference of ATA call mode <sup>c</sup>                                   | 109                       | 3.82 (1.06)             | 152                                    | 3.42 (1.53)             | 0.01                  |
| Long-term perceived usefulness                                             | 76                        | 3.71 (0.92)             | 71                                     | 3.68 (1.13)             | 0.84                  |
| ATA call completion rate <sup>c</sup>                                      | 108                       | 0.70 (0.26)             | 303                                    | 0.50 (0.33)             | <.001                 |

<sup>a</sup>Values are numbers (column percentages) for categorical variables and mean (SD) for continuous variables

<sup>b</sup>Chi-square test for categorical variables and two-sample t-test for continuous variables

<sup>c</sup>Assessment at 6 or 12 months. If both were available, then the average was taken.

<sup>d</sup>Symptoms CheckList, 20 items

<sup>e</sup>Short-Form Health Survey, 12 items

<sup>f</sup>Body mass index

<sup>g</sup>Glycated hemoglobin test

<sup>h</sup>International Classification of Diseases, 9th Revision

Table A-2. Comparison of samples in the second analysis to the rest of patients in the TC arm of DCAT

| Characteristic                | Sample for Second Analysis |                         | Rest of Patients in the TC Arm of DCAT |                         | <i>P</i> <sup>b</sup> |
|-------------------------------|----------------------------|-------------------------|----------------------------------------|-------------------------|-----------------------|
|                               | N                          | Statistics <sup>a</sup> | N                                      | Statistics <sup>a</sup> |                       |
| Female                        | 125                        | 80 (64.0%)              | 333                                    | 201 (60.4%)             | 0.29                  |
| Age                           | 125                        | 51.31 (8.81)            | 317                                    | 53.09 (8.91)            | 0.06                  |
| Hispanic/Latino               | 125                        | 116 (92.8%)             | 332                                    | 295 (88.9%)             | 0.02                  |
| Spanish as preferred language | 125                        | 104 (83.2%)             | 333                                    | 268 (80.5%)             | 0.26                  |
| Married                       | 125                        | 55 (44.0%)              | 333                                    | 174 (52.3%)             | 0.19                  |
| PHQ-9 (range 0–27,            | 125                        | 5.65 (4.60)             | 317                                    | 5.50 (5.18)             | 0.78                  |

| Characteristic                                                                           | Sample for Second Analysis |                         | Rest of Patients in the TC Arm of DCAT |                         | P <sup>b</sup> |
|------------------------------------------------------------------------------------------|----------------------------|-------------------------|----------------------------------------|-------------------------|----------------|
|                                                                                          | N                          | Statistics <sup>a</sup> | N                                      | Statistics <sup>a</sup> |                |
| higher=more severe depression) <sup>b, c</sup>                                           |                            |                         |                                        |                         |                |
| Total number of socioeconomic stressors <sup>c</sup>                                     | 125                        | 2.37 (1.46)             | 317                                    | 2.31 (1.63)             | 0.72           |
| SCL-20, mean score <sup>c, d</sup>                                                       | 125                        | 0.51 (0.48)             | 317                                    | 0.52 (0.54)             | 0.89           |
| SF-12 mental (general population=50, higher=better) <sup>c, e</sup>                      | 125                        | 51.08 (9.03)            | 317                                    | 50.76 (10.18)           | 0.76           |
| Time with diabetes in years                                                              | 124                        | 9.98 (7.05)             | 313                                    | 10.70 (7.27)            | 0.35           |
| On insulin treatment <sup>c</sup>                                                        | 125                        | 89 (71.2%)              | 317                                    | 222 (70.0%)             | 0.81           |
| BMI <sup>c, f</sup>                                                                      | 125                        | 32.75 (6.16)            | 317                                    | 33.00 (6.97)            | 0.73           |
| A1C value <sup>c, g</sup>                                                                | 124                        | 8.72 (1.39)             | 316                                    | 9.20 (1.59)             | 0.003          |
| Low-density lipoprotein cholesterol <sup>c</sup>                                         | 124                        | 168.44 (36.60)          | 316                                    | 171.53 (39.57)          | 0.45           |
| Whitty-9 diabetes symptoms (range 1–5, 1=none to 5=every day) <sup>c</sup>               | 125                        | 1.62 (0.49)             | 317                                    | 1.60 (0.50)             | 0.65           |
| Number of diabetes complications <sup>c</sup>                                            | 125                        | 1.22 (0.79)             | 317                                    | 1.27 (1.01)             | 0.57           |
| Toolbert diabetes self-care in the past 7 days (range 0–7) <sup>c</sup>                  | 125                        | 4.65 (1.01)             | 317                                    | 4.40 (1.07)             | 0.02           |
| Diabetes emotional burden (range 1–5, 1=not a problem to 5=very burdensome) <sup>c</sup> | 125                        | 2.48 (1.37)             | 317                                    | 2.50 (1.50)             | 0.90           |
| Diabetes regime distress (range 1–5, 1=not a problem to 5=very burdensome) <sup>c</sup>  | 125                        | 2.13 (1.17)             | 317                                    | 2.21 (1.37)             | 0.58           |
| Self-rated health (range 1–5, 1=poor to 5=excellent) <sup>c</sup>                        | 125                        | 2.34 (0.60)             | 317                                    | 2.36 (0.71)             | 0.81           |
| Chronic pain <sup>c</sup>                                                                | 125                        | 24 (19.2%)              | 333                                    | 51 (16.1%)              | 0.43           |
| SF-12 physical (general population=50, higher=better health) <sup>c, e</sup>             | 125                        | 43.17 (9.49)            | 317                                    | 43.88 (9.54)            | 0.48           |
| Sheehan disability scale (range 0–10, 0=none to 10=extremely) <sup>c</sup>               | 125                        | 2.14 (2.26)             | 317                                    | 2.17 (2.46)             | 0.91           |
| Number of ICD-9 diagnosis <sup>c, h</sup>                                                | 124                        | 8.46 (4.46)             | 316                                    | 7.98 (4.14)             | 0.29           |
| Number of clinic visits <sup>c</sup>                                                     | 124                        | 10.56 (5.64)            | 300                                    | 9.44 (5.53)             | 0.06           |
| Number of emergency room visits <sup>c</sup>                                             | 44                         | 1.33 (0.60)             | 87                                     | 1.09 (0.27)             | 0.31           |
| Number of hospitalizations <sup>c</sup>                                                  | 18                         | 1.39 (0.78)             | 30                                     | 1.09 (0.27)             | 0.14           |
| Willingness to use <sup>c</sup>                                                          | 125                        | 4.00 (1.08)             | 137                                    | 3.53 (1.34)             | 0.002          |
| Perceived ease-of-use <sup>c</sup>                                                       | 125                        | 4.12 (0.50)             | 130                                    | 3.91 (0.70)             | 0.005          |

| Characteristic                           | Sample for Second Analysis |                         | Rest of Patients in the TC Arm of DCAT |                         | <i>P</i> <sup>b</sup> |
|------------------------------------------|----------------------------|-------------------------|----------------------------------------|-------------------------|-----------------------|
|                                          | N                          | Statistics <sup>a</sup> | N                                      | Statistics <sup>a</sup> |                       |
| Perceived usefulness <sup>c</sup>        | 125                        | 3.69 (0.90)             | 129                                    | 3.54 (0.93)             | 0.17                  |
| Perceived non-intrusiveness <sup>c</sup> | 125                        | 4.29 (0.84)             | 130                                    | 3.92 (0.70)             | 0.003                 |
| Perceived privacy/security <sup>c</sup>  | 125                        | 4.17 (1.08)             | 132                                    | 4.07 (1.14)             | 0.47                  |
| Preference of ATA call mode <sup>c</sup> | 125                        | 3.58 (1.32)             | 136                                    | 3.59 (1.41)             | 0.98                  |
| Long-term perceived usefulness           | 125                        | 3.74 (0.99)             | 22                                     | 3.45 (1.18)             | 0.24                  |
| ATA call completion rate <sup>c</sup>    | 123                        | 0.74 (0.24)             | 288                                    | 0.48 (0.32)             | <.001                 |

<sup>a</sup>Values are numbers (column percentages) for categorical variables and mean (SD) for continuous variables

<sup>b</sup>Chi-square test for categorical variables and two-sample t-test for continuous variables

<sup>c</sup>Assessment at 6 or 12 months. If both were available, then the average was taken.

<sup>d</sup>Symptoms CheckList, 20 items

<sup>e</sup>Short-Form Health Survey, 12 items

<sup>f</sup>Body mass index

<sup>g</sup>Glycated hemoglobin test

<sup>h</sup>International Classification of Diseases, 9th Revision

Table A-3. Characteristics of patients reporting high versus low willingness to use ATA calls at 18 months

| Characteristic                                                      | High willingness to use ATA calls at 18 months |                         | Low willingness to use ATA calls at 18 months |                         | <i>P</i> <sup>b</sup> |
|---------------------------------------------------------------------|------------------------------------------------|-------------------------|-----------------------------------------------|-------------------------|-----------------------|
|                                                                     | N                                              | Statistics <sup>a</sup> | N                                             | Statistics <sup>a</sup> |                       |
| Female                                                              | 74                                             | 52 (70.3%)              | 51                                            | 28 (54.9%)              | 0.08                  |
| Age                                                                 | 74                                             | 51.97 (8.56)            | 51                                            | 50.35 (9.16)            | 0.41                  |
| Hispanic/Latino                                                     | 74                                             | 71 (95.9%)              | 51                                            | 45 (88.2%)              | 0.10                  |
| Spanish as preferred language                                       | 74                                             | 65 (87.8%)              | 51                                            | 39 (76.5%)              | 0.10                  |
| Married                                                             | 74                                             | 32 (43.2%)              | 51                                            | 23 (45.1%)              | 0.84                  |
| PHQ-9 (range 0–27, higher=more severe depression) <sup>b, c</sup>   | 74                                             | 5.62 (4.58)             | 51                                            | 5.69 (4.69)             | 0.94                  |
| Total number of socioeconomic stressors <sup>c</sup>                | 74                                             | 2.46 (1.45)             | 51                                            | 2.25 (1.48)             | 0.38                  |
| SCL-20, mean score <sup>c, d</sup>                                  | 74                                             | 0.52 (0.47)             | 51                                            | 0.50 (0.51)             | 0.84                  |
| SF-12 mental (general population=50, higher=better) <sup>c, e</sup> | 74                                             | 50.40 (9.18)            | 51                                            | 52.07 (8.81)            | 0.31                  |
| Time with diabetes in years                                         | 73                                             | 9.88 (7.12)             | 51                                            | 10.14 (7.01)            | 0.84                  |
| On insulin treatment <sup>c</sup>                                   | 74                                             | 53 (71.6%)              | 51                                            | 36 (70.6%)              | 0.90                  |
| BMI <sup>c, f</sup>                                                 | 74                                             | 32.54 (6.20)            | 51                                            | 33.06 (6.16)            | 0.65                  |
| A1C value <sup>c, g</sup>                                           | 74                                             | 8.71 (1.30)             | 50                                            | 8.73 (1.53)             | 0.91                  |
| Low-density lipoprotein                                             | 74                                             | 172.03                  | 50                                            | 166.10                  | 0.56                  |

| Characteristic                                                                           | High willingness to use ATA calls at 18 months |                         | Low willingness to use ATA calls at 18 months |                         | <i>P</i> <sup>b</sup> |
|------------------------------------------------------------------------------------------|------------------------------------------------|-------------------------|-----------------------------------------------|-------------------------|-----------------------|
|                                                                                          | N                                              | Statistics <sup>a</sup> | N                                             | Statistics <sup>a</sup> |                       |
| cholesterol <sup>c</sup>                                                                 |                                                | (37.36)                 |                                               | (35.68)                 |                       |
| Whitty-9 diabetes symptoms (range 1–5, 1=none to 5=every day) <sup>c</sup>               | 74                                             | 1.59 (0.46)             | 51                                            | 1.67 (0.53)             | 0.34                  |
| Number of diabetes complications <sup>c</sup>                                            | 74                                             | 1.27 (0.83)             | 51                                            | 1.15 (0.73)             | 0.42                  |
| Toolbert diabetes self-care in the past 7 days (range 0–7) <sup>c</sup>                  | 74                                             | 4.81 (0.95)             | 51                                            | 4.43 (1.05)             | 0.03                  |
| Diabetes emotional burden (range 1–5, 1=not a problem to 5=very burdensome) <sup>c</sup> | 74                                             | 2.50 (1.37)             | 51                                            | 2.46 (1.37)             | 0.87                  |
| Diabetes regime distress (range 1–5, 1=not a problem to 5=very burdensome) <sup>c</sup>  | 74                                             | 2.14 (1.14)             | 51                                            | 2.13 (1.23)             | 0.96                  |
| Self-rated health (range 1–5, 1=poor to 5=excellent) <sup>c</sup>                        | 74                                             | 2.37 (0.59)             | 51                                            | 2.30 (0.62)             | 0.52                  |
| Chronic pain <sup>c</sup>                                                                | 74                                             | 13 (17.6%)              | 51                                            | 11 (21.6%)              | 0.58                  |
| SF-12 physical (general population=50, higher=better health) <sup>c, e</sup>             | 74                                             | 43.48 (9.53)            | 51                                            | 42.72 (9.51)            | 0.66                  |
| Sheehan disability scale (range 0–10, 0=none to 10=extremely) <sup>c</sup>               | 74                                             | 2.13 (2.08)             | 51                                            | 2.15 (2.53)             | 0.97                  |
| Number of ICD-9 diagnosis <sup>c, h</sup>                                                | 74                                             | 8.30 (4.02)             | 50                                            | 8.69 (5.08)             | 0.63                  |
| Number of clinic visits <sup>c</sup>                                                     | 74                                             | 10.97 (5.75)            | 50                                            | 9.96 (5.47)             | 0.33                  |
| Number of emergency room visits <sup>c</sup>                                             | 29                                             | 1.44 (0.69)             | 15                                            | 1.10 (0.28)             | 0.07                  |
| Number of hospitalizations <sup>c</sup>                                                  | 11                                             | 1.45 (0.82)             | 7                                             | 1.29 (0.76)             | 0.67                  |
| Willingness to use <sup>c</sup>                                                          | 74                                             | 4.17 (1.00)             | 51                                            | 3.75 (1.16)             | 0.04                  |
| Perceived ease-of-use <sup>c</sup>                                                       | 74                                             | 4.17 (0.50)             | 51                                            | 4.05 (0.51)             | 0.17                  |
| Perceived usefulness <sup>c</sup>                                                        | 74                                             | 3.84 (0.82)             | 51                                            | 3.49 (0.97)             | 0.03                  |
| Perceived non-intrusiveness <sup>c</sup>                                                 | 74                                             | 4.42 (0.65)             | 51                                            | 4.09 (1.03)             | 0.05                  |
| Perceived privacy/security <sup>c</sup>                                                  | 74                                             | 4.42 (0.91)             | 51                                            | 3.81 (1.22)             | 0.003                 |
| Preference of ATA call mode <sup>c</sup>                                                 | 74                                             | 3.66 (1.35)             | 51                                            | 3.47 (1.29)             | 0.43                  |
| Long-term perceived usefulness                                                           | 74                                             | 4.07 (0.91)             | 51                                            | 3.25 (0.91)             | <.001                 |
| ATA call completion rate <sup>c</sup>                                                    | 72                                             | 0.75 (0.23)             | 51                                            | 0.73 (0.25)             | 0.56                  |

<sup>a</sup>Values are numbers (column percentages) for categorical variables and mean (SD) for continuous variables

<sup>b</sup>Chi-square test for categorical variables and two-sample t-test for continuous variables

<sup>c</sup>Assessment at 6 or 12 months. If both were available, then the average was taken.

<sup>d</sup>Symptoms CheckList, 20 items

<sup>e</sup>Short-Form Health Survey, 12 items

<sup>f</sup>Body mass index

<sup>g</sup>Glycated hemoglobin test

<sup>h</sup>International Classification of Diseases, 9th Revision
